# Supplementary material for: Assessment of Food Insecurity, Diet Quality, and Mental Health Status Among Syrian Refugee Mothers
Source: Research Square preprint supplement (doi:10.21203/rs.3.rs-6757092/v1), 2025-06-16
Supplement: Supplementary file 1 [file cafd276d876c9ff8cf890620.docx]

**Title of the study:**

**Assessment of food insecurity, diet quality, and mental health status among Syrian refugee mothers**

DATA COLLECTION TOOL (QUESTIONNAIRE)

A. Demographic Information of the Mother

1. Age (years):

2. Education level of the mother:

- Illiterate
- Literate
- Primary school
- High school
- University/higher education

3. Father's education level:

- Illiterate
- Literate
- Primary school
- High school
- University/higher education

4. Occupation:

- Housewife
- Civil servant
- Worker
- Other...

5. Marital status:

- Married
- Married, separated
- Divorced/Husband deceased
- 6. How many years has he been living in Turkey: .......

7. Number of children of the mother: .......

8. Income status of the family:

- Income less than expenditure
- Income equal to expenditure
- Income more than expenditure

9. Does he/she receive assistance from any organisation?

- Yes
- No

10. Anaemia of the mother:

- Yes
- No

11. Do you use any nutritional supplements?

- Yes
- No

12. Chronic diseases status:

- Yes
- No

13. Do you smoke?

- Yes
- No

14. Your family type:

- nuclear family
- extended family

15. Which traditional foods from your own country do you consume? ....................

B. Anthropometric measurements of the mother

Body weight

Height:

Waist circumference:

Hip circumference:

Waist/hip ratio:

**The Patient Health Questionnaire-9 (PHQ-9)**

**24-Hour Dietary Recall**

|  | **Meal/Item Consumed** | **Portion Size** | **Includes (details…)** |
| --- | --- | --- | --- |
| **Breakfast** |  |  |  |
| **Morning Snack** |  |  |  |
| **Lunch** |  |  |  |
| **Afternoon Snack** |  |  |  |
| **Dinner** |  |  |  |
| **Evening Snack** |  |  |  |

| Over the *last 2 weeks*, how often have you been bothered by any of the following problems? | Not at all | Several days | More than half the days | Nearly every day |
| --- | --- | --- | --- | --- |
| 1-Little interest or pleasure in doing things | 0 ☐ | 1 ☐ | 2 ☐ | 3 ☐ |
| 2-Feeling down, depressed, or hopeless | 0 ☐ | 1 ☐ | 2 ☐ | 3 ☐ |
| 3-Trouble falling or staying asleep, or sleeping too much | 0 ☐ | 1 ☐ | 2 ☐ | 3 ☐ |
| 4-Feeling tired or having little energy | 0 ☐ | 1 ☐ | 2 ☐ | 3 ☐ |
| 5-Poor appetite or overeating | 0 ☐ | 1 ☐ | 2 ☐ | 3 ☐ |
| 6-Feeling bad about yourself—or that you are a failure or have let yourself or your family down | 0 ☐ | 1 ☐ | 2 ☐ | 3 ☐ |
| 7-Trouble concentrating on things, such as reading the newspaper or watching television | 0 ☐ | 1 ☐ | 2 ☐ | 3 ☐ |
| 8-Moving or speaking so slowly that other people could have noticed? Or the opposite—being so fidgety or restless that you have been moving around a lot more than usual | 0 ☐ | 1 ☐ | 2 ☐ | 3 ☐ |
| 9-Thoughts that you would be better off dead or of hurting yourself in some way | 0 ☐ | 1 ☐ | 2 ☐ | 3 ☐ |

**Health Eating Index-2020 (HEI-2020)**

| Component | Maximum Score | Amount for Maximum Score | Amount for Minimum Score (0 points) |
| --- | --- | --- | --- |
| Total Fruits | 5 | ≥192 g per 1000 kcal | 0 |
| Whole Fruits | 5 | ≥96 g per 1000 kcal | 0 |
| Total Vegetables | 5 | ≥264 g per 1000 kcal | 0 |
| Greens and Beans | 5 | ≥48 g per 1000 kcal | 0 |
| Whole Grains | 10 | ≥42 g per 1000 kcal | 0 |
| Dairy | 10 | ≥312 g per 1000 kcal | 0 |
| Total Protein Foods | 5 | ≥70 g per 1000 kcal | 0 |
| Seafood and Plant Proteins | 5 | ≥22.4 g per 1000 kcal | 0 |
| Fatty Acids ((PUFA+MUFA)/SFA ratio) | 10 | ≥2.5 | ≤1.2 |
| Refined Grains | 10 | ≤50.4 g per 1000 kcal | ≥120.4 g per 1000 kcal |
| Sodium | 10 | ≤1.1 g per 1000 kcal | ≥2.0 g per 1000 kcal |
| Added Sugars (% of energy) | 10 | ≤6.5% | ≥26% |
| Saturated Fats (% of energy) | 10 | ≤8% | ≥16% |

**The Food Insecurity Experience Scale (FIES)**

| *Now I would like to ask you some questions about food..*  *During the last 12 MONTHS, was there a time when:* | Yes | No |
| --- | --- | --- |
| 1. You were worried you would not have enough food to eat because of a lack of money or other resources? |  |  |
| 2. You were unable to eat healthy and nutritious food because of a lack of money or other resources? |  |  |
| 3. You ate only a few kinds of foods because of a lack of money or other resources? |  |  |
| 4. You had to skip a meal because there was not enough money or other resources to get food? |  |  |
| 5. You ate less than you thought you should because of a lack of money or other resources? |  |  |
| 6. Your household ran out of food because of a lack of money or other resources? |  |  |
| 7. You were hungry but did not eat because there was not enough  money or other resources for food? |  |  |
| 8. You went without eating for a whole day because of a lack of money or other resources? |  |  |
